# Supplementary material
Source: PubMed Central journal article supplement (PMC3209361)
Supplement: supp_85.23.12455_FigS1.pdf [file supp_85.23.12455_FigS1.pdf]

**Supplementary Figure 1-** Sequence conservation of HA2 peptide used in H5N1-SeroDetect with large number of H5N1 strains from 1997-2011 from different clades.

# Supplementary figure 1

|                                | 10                                  | 20 |
|--------------------------------|-------------------------------------|----|
| HA2 Peptide in H5N1-SeroDetect | ..... ..... ..... ..... ..... ..... |    |
|                                | DYPQYSEEARLKREEISGVKLESIGIYQI       |    |
| AAC32098 A/Hong Kong/481/97 19 | .....N.....M.T...                   |    |
| AAF74331 A/Hong Kong/486/97 19 | .....N.....M.T...                   |    |
| AAD21153 A/Hong Kong/486/97 19 | .....N.....M.T...                   |    |
| AAD21158 A/HongKong/97/98 1998 | .....N.....M.T...                   |    |
| ACZ48508 A/Hong Kong/378.1/200 | .....N.....M.T...                   |    |
| ABP51975 A/Hong Kong/213/2003  | .....T...                           |    |
| AAT39065 A/HK/212/03 2003// H  | .....T...                           |    |
| AAT39066 A/Hong Kong/213/2003  | .....T...                           |    |
| ABQ58979 A/Beijing/01/2003 200 | .....T.N.....M.T...                 |    |
| ADF83671 A/Vietnam/UT3028/2003 | .....                               |    |
| AAS89004 A/Thailand/3{SP-83}/2 | .....                               |    |
| AAV34704 A/Thailand/4{SP-528}/ | .....                               |    |
| ABP51976 A/Viet Nam/1194/2004  | .....                               |    |
| ABP51977 A/Viet Nam/1203/2004  | .....                               |    |
| ABP51991 A/Thailand/Chaiyaphum | .....G.....                         |    |
| ABU99108 A/Vietnam/1196/2004 2 | .....                               |    |
| ABP51982 A/Thailand/16/2004 20 | .....                               |    |
| ABE97624 A/Vietnam/CL01/2004 2 | .....                               |    |
| AAT73273 A/Viet Nam/1194/2004  | .....                               |    |
| ABX10515 A/Thailand/16/2004 20 | .....                               |    |
| AAS65615 A/Thailand/1{KAN-1}/2 | .....                               |    |
| AAS65618 A/Thailand/2{SP-33}/2 | .....                               |    |
| ABE97627 A/Vietnam/CL20/2004 2 | .....                               |    |
| ABE97628 A/Vietnam/CL26/2004 2 | .....                               |    |
| ABE97629 A/Vietnam/CL36/2004 2 | .....                               |    |
| ADL39522 A/Thailand/WRAIR1720H | .....                               |    |
| ADF83667 A/Vietnam/UT3040/2004 | .....                               |    |
| ADF83662 A/Vietnam/HN30262IIIM | .....                               |    |
| BAE46949 A/Hanoi/30408/2005 20 | .....K..G.....                      |    |
| ABJ98523 A/Thailand/NKFE/2005  | .....                               |    |
| ABJ98525 A/Thailand/NKNP/2005  | .....                               |    |
| ABJ98527 A/Thailand/RPFE/2005  | .....                               |    |
| ABJ98529 A/Thailand/RPNP/2005  | .....                               |    |
| ABJ98531 A/Thailand/HA20/2005  | .....                               |    |
| ABO10183 A/Viet Nam/JP4207/200 | .....                               |    |
| ABO10184 A/Viet Nam/JP14/2005  | .....                               |    |

# Supplementary figure 1 continued

|          |                       |        |   |
|----------|-----------------------|--------|---|
| ABO10187 | A/Cambodia/JP52a/2005 | .....  |   |
| ABD28180 | A/Anhui/1/2005 2005// | .....  | T |
| ABD28181 | A/Anhui/2/2005 2005// | .....  | T |
| ABD28182 | A/Guangxi/1/2005 2005 | .....  | T |
| ABE97631 | A/Vietnam/CL105/2005  | .....  |   |
| ABD16284 | A/Thailand/NK165/2005 | .....  |   |
| ABW06367 | A/Indonesia/7/2005 20 | N..... | T |
| ABW06377 | A/Indonesia/6/2005 20 | N..... |   |
| ABC72655 | A/Thailand/676/2005 2 | .....  |   |
| ABE97632 | A/Vietnam/CL115/2005  | .....  | N |
| ABE97633 | A/Vietnam/CL119/2005  | .....  |   |
| ABE97634 | A/Vietnam/CL2009/2005 | .....  | N |
| ADG59048 | A/Anhui/2/2005 2005// | .....  | T |
| ADG59086 | A/Guangxi/1/2005 2005 | .....  | T |
| ADG59080 | A/Anhui/1/2005 2005// | .....  | T |
| BAK20423 | A/Cambodia/408008/200 | .....  |   |
| ADF83661 | A/Vietnam/UT30408III/ | .....  | K |
| ABW06108 | A/Indonesia/5/2005 20 | N..... | T |
| ABP51969 | A/Indonesia/5/2005 20 | N..... | T |
| ABI36012 | A/Indonesia/CDC7/2005 | N..... | T |
| ADF83660 | A/Vietnam/UT30850/200 | .....  | T |
| ABW06336 | A/Indonesia/195H/2005 | N..... | T |
| ACJ68613 | A/Jiangxi/1/2005 2005 | .....  | T |
| ACJ68610 | A/Fujian/1/2005 2005/ | .....  | T |
| ABI36043 | A/Indonesia/CDC287T/2 | N..... | T |
| ABD66293 | A/Iraq/207-NAMRU3/200 | .....  | T |
| ABE01046 | A/Egypt/2782-NAMRU3/2 | .....  | T |
| ABI34142 | A/Guangzhou/1/2006 20 | .....  | T |
| ABK32775 | A/Egypt/2763-NAMRU3/2 | .....  | T |
| ABK32776 | A/Egypt/2783-NAMRU3/2 | .....  | T |
| ABR10842 | A/China/2006 2006// H | .....  | T |
| ABU53966 | A/Egypt/2991-NAMRU3/2 | .....  | T |
| ABU53967 | A/Egypt/2992-NAMRU3/2 | .....  | T |

# Supplementary figure 1 continued

|          |                       |   |         |   |
|----------|-----------------------|---|---------|---|
| ACT15332 | A/Egypt/N03434/2009   | 2 | .....   |   |
| ACT15334 | A/Egypt/N03438/2009   | 2 | .....   | T |
| ACT15336 | A/Egypt/N03439/2009   | 2 | .....   | T |
| ACT15338 | A/Egypt/N03450/2009   | 2 | .....   | T |
| ACT15340 | A/Egypt/N04316/2009   | 2 | .....   | T |
| ACT15342 | A/Egypt/N04394/2009   | 2 | .....   | T |
| ACT15343 | A/Egypt/N04395/2009   | 2 | .....   | T |
| ACT15345 | A/Egypt/N04396/2009   | 2 | .....   | T |
| ACT15347 | A/Egypt/N04526/2009   | 2 | .....   |   |
| ACT15349 | A/Egypt/N04527/2009   | 2 | .....   | T |
| ACT15351 | A/Egypt/N04822/2009   | 2 | .....   |   |
| ACT15353 | A/Egypt/N04823/2009   | 2 | .....   | T |
| ACT15355 | A/Egypt/N04979/2009   | 2 | .....   |   |
| ACT15357 | A/Egypt/N05056/2009   | 2 | .....   | T |
| ADG21410 | A/Egypt/N05912/2009   | 2 | .....   | T |
| ADG21414 | A/Egypt/N07908/2009   | 2 | .....   | T |
| ADG21416 | A/Egypt/N08835/2009   | 2 | .....   | T |
| ADG21418 | A/Egypt/N09174/2009   | 2 | .....   | T |
| ADG21420 | A/Egypt/N09539/2009   | 2 | .....   | T |
| ADG21422 | A/Egypt/N11981/2009   | 2 | ..... S | T |
| ADG21425 | A/Egypt/N15262/2009   | 2 | .....   | T |
| ADG21427 | A/Egypt/N00269/2010   | 2 | .....   | T |
| ADG21429 | A/Egypt/N00270/2010   | 2 | .....   | T |
| ADG21431 | A/Egypt/N01360/2010   | 2 | ..... R | T |
| ADG21433 | A/Egypt/N01644/2010   | 2 | .....   | T |
| ADG21435 | A/Egypt/N01982/2010   | 2 | .....   | T |
| ADG21439 | A/Egypt/N02127/2010   | 2 | .....   | T |
| ADG21437 | A/Egypt/N02038/2010   | 2 | .....   | T |
| ADG21441 | A/Egypt/N02554/2010   | 2 | .....   | T |
| ADG21443 | A/Egypt/N02770/2010   | 2 | .....   | T |
| ADG21445 | A/Egypt/N03071/2010   | 2 | .....   | T |
| ADG21447 | A/Egypt/N03072/2010   | 2 | .....   | T |
| ADG21449 | A/Egypt/N04434/2010   | 2 | .....   | T |
| ADQ92372 | A/Hong Kong/6841/2010 |   | .. H    |   |
| AEA50985 | A/Bangladesh/3233/201 |   | ..... S |   |
